# Supplementary material for: In situ shape and phase transformation synthesis of Co3S4 nanosheet arrays for high-performance electrochemical supercapacitors
Source: Royal Society of Chemistry journal article supplement (doi:10.1039/c3ra44237c), 2013-01-01
Supplement: c3ra44237c.pdf [file c3ra44237c.pdf]

## Supporting Information

### ***In-situ* Shape and Phase Transformation Synthesis of Co<sub>3</sub>S<sub>4</sub> Nanosheet Arrays for High-Performance Electrochemical Supercapacitors**

Qiong Chen, Hongxing Li\*, Canying Cai, Sui Yang, Kai Huang, Xiaolin Wei and Jianxin Zhong\*

Email: hongxinglee@xtu.edu.cn; and jxzhong@xtu.edu.cn

#### **1. Experimental section**

##### **1.1. Preparation of Co<sub>3</sub>S<sub>4</sub> Nanosheet Arrays**

The Co<sub>3</sub>S<sub>4</sub> nanosheet arrays electrode materials were synthesized on nickel foam *via* an *ion-exchange* reaction by employing Co<sub>3</sub>O<sub>4</sub> nanowire arrays as the shape and phase sacrificing template. First, Co<sub>3</sub>O<sub>4</sub> nanowire arrays were prepared on nickel foam by a hydrothermal process similar to described previously.<sup>[1]</sup> In detail, Ni foam (approximately 1 cm×3 cm) substrate was carefully cleaned with 3M HCl solution, de-ionized water and absolute ethanol with the assistance of an ultrasound bath each for 5 min in order to remove the possible NiO layer on the surface. The Ni foam was put in a Teflon-lined stainless steel autoclave with homogeneous aqueous solution containing 4mmol Co(NO<sub>3</sub>)<sub>2</sub>·6H<sub>2</sub>O, 8mmol NH<sub>4</sub>F and 20mmol urea, respectively. After 5h growth at 120°C, the Ni foam was carefully rinsed several times with de-ionized water and cleaned with the assistance of ultrasonication several seconds to remove the loosely attached products on the surface, and then dried in air. Then, the product was annealed at 250°C for 2h with a ramping rate of 5°C min<sup>-1</sup> in air to completely transform into black Co<sub>3</sub>O<sub>4</sub> nanostructures (Co<sub>3</sub>O<sub>4</sub> mass loading: ~1.97mg/cm<sup>2</sup>). For synthesis the Co<sub>3</sub>S<sub>4</sub> products, the pre-grown Co<sub>3</sub>O<sub>4</sub> nanowire-Ni foam was put into a Teflon-lined autoclave containing 0.02M Na<sub>2</sub>S aqueous solution and maintained at 95°C for 24h. After the reaction, the converted sample was taken out and rinsed several times with de-ionized water, and finally dried in an oven at 60°C for 12h. The Co<sub>3</sub>S<sub>4</sub> mass loading on Ni foam after conversion is ~2.49mg/cm<sup>2</sup>.

## 1.2. Material Characterization.

The products were characterized by X-ray diffraction (XRD; Bruker D-8 Avance), scanning electron microscopy (SEM, 5.0kV) equipped with an energy dispersive X-ray spectrometer (EDS) and transmission electron microscopy (TEM; JEM-2010FEF, 200kV). N<sub>2</sub> adsorption-desorption measurements were conducted at 77K on a Nove 2200e analyzer.

## 1.3. Electrochemical Measurements

The electrochemical tests were performed with a electrochemical workstation (CHI660D CH Instruments Inc. Shanghai), using a three-electrode cell, and performed at room temperature in a 2.0M KOH electrolyte within the potential window of -0.2 to 0.5V. Pt foil and Ag/AgCl were served as the counter electrode and the reference electrode, respectively. The nickel foam supported Co<sub>3</sub>S<sub>4</sub> nanosheet arrays and Co<sub>3</sub>O<sub>4</sub> nanowire arrays (~1cm<sup>2</sup> area) were used as the working electrodes directly. EIS measurements were performed by applying an AC voltage with 5 mV amplitude in a frequency range from 0.01 Hz to 100 kHz at open circuit potential.

## 2. Figures and Captions

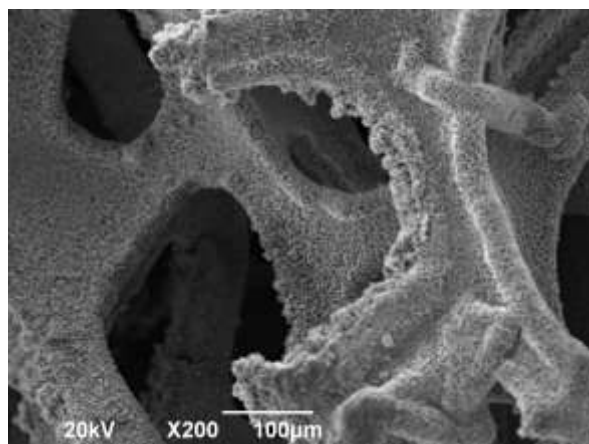

**Fig. S1** Large-scale view of SEM image of the Co<sub>3</sub>S<sub>4</sub> nanosheet arrays on Ni foam.

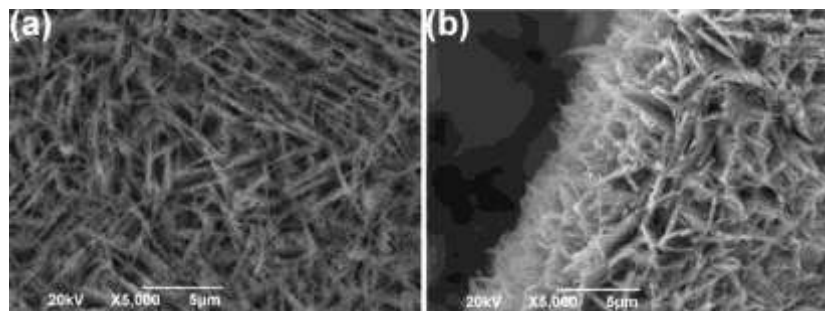

**Fig. S2** SEM images of the sample obtained with the reaction time for 6h under the same condition.

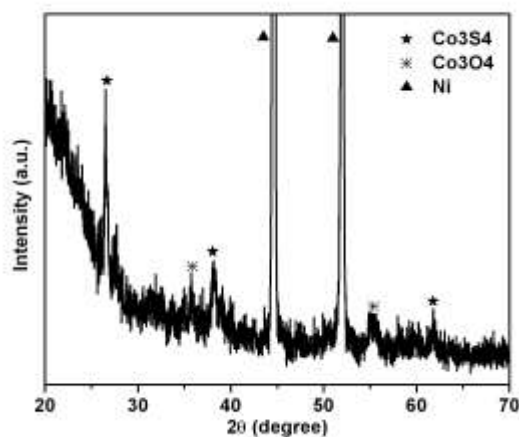

**Fig.S3** XRD pattern of the product obtained for 6 h reaction, indicating that the pre-grown  $\text{Co}_3\text{O}_4$  has been partly converted into  $\text{Co}_3\text{S}_4$ .

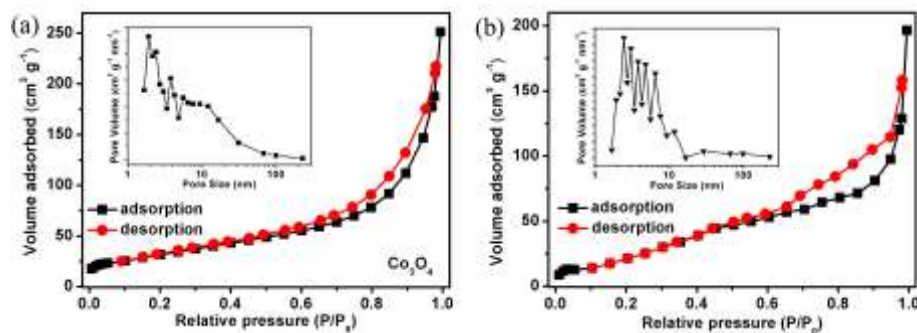

**Fig.S4**  $\text{N}_2$  adsorption-desorption isotherm and the corresponding pore size distribution (inset) of the pre-grow  $\text{Co}_3\text{O}_4$  NWs (a) and the  $\text{Co}_3\text{S}_4$  NSs (b) using BJH method.

## Reference

- (1) J. Jiang, J. P. Liu, X. T. Huang, Y. Y. Li, R. M. Ding, X. X. Ji, Y. Y. Hu, Q. B. Chi and Z. H. Zhu *Crystal Growth & Design*, **2010**, *10*, 70.
